# Supplementary material for: Bacterial Signaling Nucleotides Inhibit Yeast Cell Growth by Impacting Mitochondrial and Other Specifically Eukaryotic Functions
Source: PubMed Central journal article supplement (PMC5527313; doi:10.1128/mbio.01047-17), 2017-07-25
Supplement: mbo004173404sf1.pdf [file mbo004173404sf1.pdf]

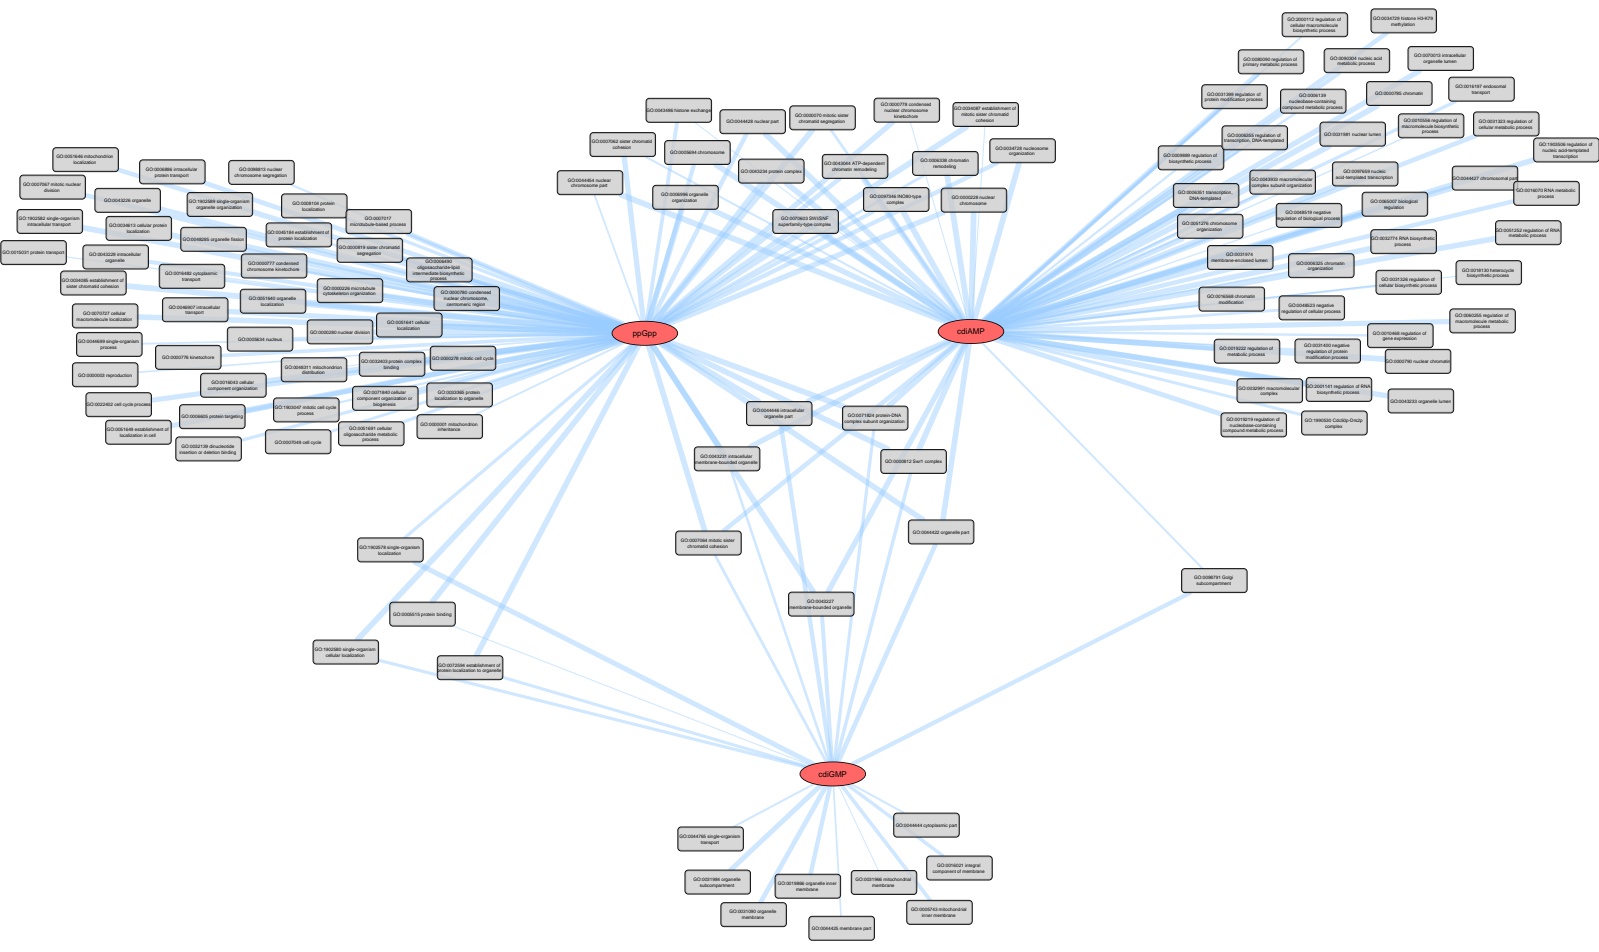

Supplementary Fig. S1. Network of GO categories significantly ( $P \leq 0.001$ ) enriched in the groups of genes showing synthetic negative interactions with each nucleotide (based on GO analysis results presented in Supplementary file 1). Line thickness is proportional to P-value, with thicker lines being more significant.
