# Supplementary material for: Bacterial Signaling Nucleotides Inhibit Yeast Cell Growth by Impacting Mitochondrial and Other Specifically Eukaryotic Functions
Source: PubMed Central journal article supplement (PMC5527313; doi:10.1128/mbio.01047-17), 2017-07-25
Supplement: mbo004173404sf3.pdf [file mbo004173404sf3.pdf]

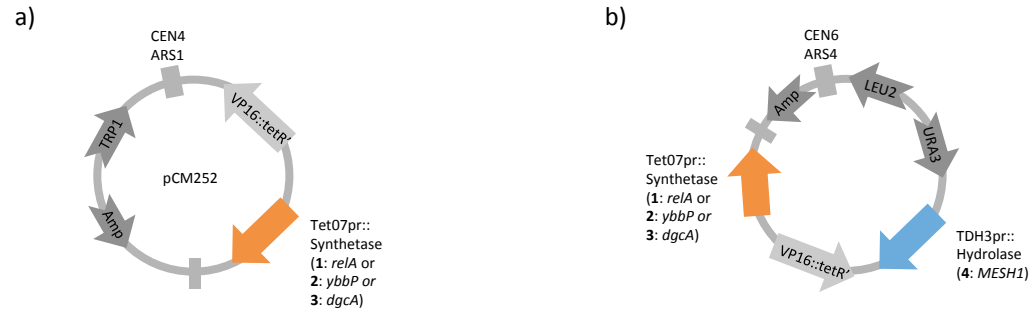

| Reaction              | Enzyme                            | Encoded in plasmid/strain number |     |     |     |     |     |     |
|-----------------------|-----------------------------------|----------------------------------|-----|-----|-----|-----|-----|-----|
|                       |                                   | a)                               | 252 | 12  | 36  | 71  |     |     |
|                       |                                   | b)                               | 134 | 135 | 136 | 137 | 139 | 142 |
| 1: ATP+GTP → (p)ppGpp | <i>Escherichia coli</i> RelA      |                                  |     | ✓   |     |     |     | ✓   |
| 2: ATP+ATP → cdiAMP   | <i>Bacillus subtilis</i> YbbP     |                                  |     |     | ✓   |     |     |     |
| 3: GTP+GTP → cdiGMP   | <i>Caulobacter crecentus</i> DgcA |                                  |     |     |     | ✓   |     |     |
| 4: ppGpp → GDP+ppi    | <i>Homo sapiens</i> Mesh1p        |                                  |     |     |     |     | ✓   | ✓   |

Summary of the centromeric plasmids generated in this study for the synthesis and degradation of bacterial nucleotides in *S. cerevisiae*.
